# Supplementary material for: Comparison of Online Survey Recruitment Platforms for Hard-to-Reach Pregnant Smoking Populations: Feasibility Study
Source: PubMed Central journal article supplement (PMC5928332; doi:10.2196/resprot.8071), 2018-04-16
Supplement: resprot_v7i4e101_app1.pdf [file resprot_v7i4e101_app1.pdf]

Before this pregnancy, how many times have you given birth?

---

---

At what age did you first become pregnant?

---

---

As of today, how many weeks pregnant are you?

---

---

When was the first day of your last menstrual period? Please type your answer in the following format: mm/dd/yyyy

---

---

What brand of cigarettes do you usually smoke?

---

---

About how many cigarettes do you smoke a day?

---

---

How many cigarettes are in a standard box of cigarettes?

---

-----

When is your due date? Please type your answer in the following format: mm/dd/yyyy

\_\_\_\_\_

-----

Do you pack your cigarettes before lighting them?

Yes

No

-----

Have you experienced swelling anywhere on your body during this pregnancy?

Yes

No

-----

When was your last prenatal visit? Please type your answer in the following format: mm/dd/yyyy

\_\_\_\_\_

-----

Have you had an ultrasound (sonogram) during this pregnancy?

Yes

No

Not yet

-----

Have you had a glucose tolerance test during this pregnancy (where you drink the sweet drink)?

- Yes
  - No
  - Not yet
- 

Have you suffered from any of the following pregnancy symptoms? [Check all that apply]

- Pregnancy elbow
  - Hearing loss
  - None
- 

Do you usually experience a head rush after smoking?

- Yes
  - No
- 

Were you prescribed zinc supplements during this pregnancy?

- Yes
  - No
-

How much does a pack of your favorite cigarettes cost in your area?

---

How soon after waking do you smoke your first cigarette? (If you have recently quit smoking, think back to before you quit smoking.)

- Within 5 minutes
- 5-30 minutes
- 31-60 minutes

Do you find it difficult to refrain from smoking in places where it is forbidden? e.g. Church, Library, etc. (If you have recently quit smoking, think back to before you quit smoking.)

- Yes
- No

Which cigarette would you hate to give up? (If you have recently quit smoking, think back to before you quit smoking.)

- The first in the morning
- Any other

Do you smoke more frequently in the morning? (If you have recently quit smoking, think back to before you quit smoking.)

Yes

No

---

Do you smoke even if you are sick in bed most of the day? (If you have recently quit smoking, think back to before you quit smoking.)

Yes

No

Twice in this survey, you were asked to rate the likelihood of certain scenarios occurring. Each time, the scenarios involved the likelihood of events occurring to you or another participant in this study. In what order did these questions appear in this survey?

Another participant, then me

Me, then another participant

Me, then me again

Another participant, then another participant again
